# Supplementary material for: Diabetes status modifies the long-term effect of lipoprotein-associated phospholipase A2 on major coronary events
Source: PubMed Central journal article supplement (PMC8660745; doi:10.1007/s00125-021-05574-5), 2021-09-25
Supplement: 125_2021_5574_MOESM1_ESM.pdf [file 125_2021_5574_MOESM1_ESM.pdf]

## Online-only supplemental materials:

### Diabetes status modifies the long-term effect of Lp-PLA<sub>2</sub> on major coronary events

M K Siddiqui et al.

#### Contents

##### Tables

ESM Table S1. Main effect of LpPLA2 per standard deviation on MCE in the GoDARTS cohort (n=6,159)

ESM Table 2. Main effect of LpPLA2 per standard deviation on MCE in placebo treated STABILITY participants (n=7,109)

ESM Table 3. Main effect of LpPLA2 (in quartiles) on MCE in the GoDARTS cohort (n= 6,159)

ESM Table 4. Effect of LpPLA2 (in quartiles) on MCE in placebo treated STABILITY trial participants (n= 7109)

ESM Table 5. Interaction effect between linear Lp-PLA2 activity and diabetes-control status on the occurrence of MCE in the GoDARTS cohort (n = 7,419\*)

ESM Table 6. Interaction effect between linear Lp-PLA2 activity and diabetes status) on the occurrence of MCE in the STABILITY trial (n = 7,109)

ESM Table 7. Interaction effect between quartiles of Lp-PLA2 activity and diabetes status) on the occurrence of MCE in the GoDARTS cohort (n = 7,419).

ESM Table 8. Interaction effect between quartiles of Lp-PLA2 activity and diabetes status on the occurrence of MCE in the placebo-treated arm of the STABILITY trial (n = 7,109).

ESM Table 9. Interaction effect between quartiles of Lp-PLA2 activity and diabetes status on the occurrence of MCE in the darapladib-treated arm of the STABILITY trial (n=7,157)

ESM Table 10. Stratified effect of successive quartiles of Lp-PLA2 activity on MCE by diabetes-control status in GoDARTS

ESM Table 11. Stratified effect of successive quartiles of Lp-PLA2 activity on MCE by type 2 diabetes status in prognostic arm of STABILITY trial

ESM Table 12: Effect of LpPLA2 inhibition in STABILITY participants with high Lp-PLA2 activity (Q4)– main text Figure 2

ESM Table 13. Association table for drug effect (Lp-PLA2 inhibition) in STABILITY sub-groups – main text Figure 3

##### Figures

ESM Fig 1. Population flow chart describing both study populations, GoDARTS upper panel and STABILITY lower panel.

ESM Fig 2. Demonstrating association between population-specific, successive Lp-PLA2 quartiles and MCE in GoDARTS (2a) and placebo-treated participants in STABILITY (2b)

ESM Fig 3. Stratified effect of successive Lp-PLA2 quartiles on the risk of MCE by diabetes control status in GoDARTS

ESM Fig 4. STABILITY trial: Hazards of increasing quartiles of Lp-PLA2 activity on the risk of MCE in participants with type 2 diabetes receiving placebo

*ESM Table S1. Main effect of LpPLA2 per standard deviation on MCE in the GoDARTS cohort (n=6,159)*

|                                              | <b>Hazard Ratio (95%CI)</b> | <b>P value</b> |
|----------------------------------------------|-----------------------------|----------------|
| LpPLA2 (per SD)                              | 1.09 (1.03, 1.15)           | 0.002          |
| Lipid-controlling medication (Yes/No)        | 1.50 (1.25, 1.79)           | <0.0001        |
| Diabetes-controlling medication (Yes/No)     | 1.46 (1.30, 1.63)           | <0.0001        |
| Hypertension controlling medication (Yes/No) | 1.68 (1.45, 1.95)           | <0.0001        |
| Age (years)                                  | 1.05 (1.048, 1.054)         | <0.0001        |
| Smoking status (Yes/No)                      | 1.28 (1.16, 1.41)           | <0.0001        |
| Sex (F v M)                                  | 1.30 (1.18, 1.44)           | <0.0001        |
| Non-HDL cholesterol (mmol/L)                 | 0.96 (0.89, 1.03)           | 0.32           |

*Proportional hazards assumptions met (P value > 0.05).*

*ESM Table 2. Main effect of LpPLA2 per standard deviation on MCE in placebo treated STABILITY participants (n=7,109)*

|                                            | <b>Hazard Ratio (95%CI)</b> | <b>P value</b> |
|--------------------------------------------|-----------------------------|----------------|
| LpPLA2 (per SD)                            | 1.30 (1.17, 1.44)           | <0.0001        |
| Age (years)                                | 1.01 (1.002, 1.023)         | 0.02           |
| Sex (F v M)                                | 0.91 (0.72, 1.16)           | 0.45           |
| Smoking status (Yes v.No)                  | 1.40 (1.15, 1.71)           | 0.0009         |
| Hypertension (Yes v No)                    | 1.30 (1.03, 1.63)           | 0.02           |
| HDL cholesterol (mmol/L)                   | 1.08 (0.80, 1.46)           | 0.64           |
| Cholesterol (mmol/L)                       | 1.04 (0.94, 1.15)           | 0.47           |
| High-sensitivity C-reactive Protein (mg/L) | 1.013 (1.006, 1.020)        | 0.0005         |
| eGFR (mL/min)                              | 0.54 (0.39, 0.73)           | <0.0001        |
| History of Coronary Heart Disease (Yes/No) | 1.12 (0.60, 2.09)           | 0.73           |
| History of Cerebrovascular Disease         | 1.29 (0.99, 1.67)           | 0.06           |
| History of Abdominal aortic aneurysm       | 0.61 (0.29, 1.29)           | 0.19           |
| History of Peripheral artery disease       | 1.22 (0.39, 3.82)           | 0.73           |
| Type 2 diabetes                            | 1.56 (1.31, 1.85)           | <0.0001        |

*Proportional hazards assumptions met (P value > 0.05).*

ESM Table 3. Main effect of LpPLA2 (in quartiles) on MCE in the GoDARTS cohort (n= 6,159)

| LpPLA2 quartiles                             | Hazard ratios (95% CI) | P value |
|----------------------------------------------|------------------------|---------|
| Quartile 2 v. 1                              | 1.11 (0.97, 1.27)      | 0.12    |
| Quartile 3 v. 1                              | 1.17 (1.02, 1.35)      | 0.002   |
| Quartile 4 v. 1                              | 1.26 (1.10, 1.46)      | <0.0001 |
| Lipid-controlling medication (Yes/No)        | 1.49 (1.25, 1.79)      | <0.0001 |
| Diabetes-controlling medication (Yes/No)     | 1.46 (1.30, 1.62)      | <0.0001 |
| Hypertension controlling medication (Yes/No) | 1.68 (1.45, 1.94)      | <0.0001 |
| Age (years)                                  | 1.05 (1.048, 1.053)    | <0.0001 |
| Sex (M v. F)                                 | 1.10 (0.99, 1.22)      | 0.05    |
| Smoking status (Yes v.No)                    | 1.28 (1.15, 1.41)      | <0.0001 |
| Non-HDL cholesterol (mmol/L)                 | 0.97 (0.90, 1.03)      | 0.32    |

*Proportional hazards assumptions met (P value >0.05). Model: MCE ~ Lp\_PLA2 + Diabetes controlling medication + hypertension controlling medication + lipid controlling medication + smoking status + LDL-cholesterol*

ESM Table 4. Effect of LpPLA2 (in quartiles) on MCE in placebo treated STABILITY trial participants (n= 7,109)

| LpPLA2 quartiles                              | Hazard ratios (95% CI) | P value |
|-----------------------------------------------|------------------------|---------|
| Quartile 2 v. 1                               | 1.10 (0.85, 1.44)      | 0.46    |
| Quartile 3 v. 1                               | 1.19 (0.91, 1.56)      | 0.20    |
| Quartile 4 v. 1                               | 1.76 (1.33, 2.33)      | <0.0001 |
| Age (years)                                   | 1.013 (1.003, 1.024)   | 0.014   |
| Sex (F v M)                                   | 0.88 (0.70, 1.12)      | 0.31    |
| Smoking status (Yes v.No)                     | 1.41 (1.15, 1.72)      | 0.0008  |
| Hypertension (Yes v No)                       | 1.30 (1.04, 1.64)      | 0.02    |
| HDL cholesterol (mmol/L)                      | 1.00 (0.74, 1.36)      | 0.98    |
| Cholesterol (mmol/L)                          | 1.08 (0.98, 1.18)      | 0.13    |
| High-sensitivity C-reactive Protein (mg/L)    | 1.013 (1.006, 1.020)   | 0.0004  |
| eGFR (mL/min)                                 | 0.53 (0.39, 0.72)      | <0.0001 |
| History of Coronary Heart Disease (Yes/No)    | 1.13 (0.61, 2.12)      | 0.70    |
| History of Cerebrovascular Disease (Yes/No)   | 1.30 (1.01, 1.69)      | 0.05    |
| History of Abdominal Aortic Aneurysm (Yes/No) | 0.62 (0.29, 1.30)      | 0.21    |
| History of Peripheral artery disease (Yes/No) | 1.22 (0.39, 3.81)      | 0.74    |
| Type 2 diabetes (Yes/No)                      | 1.54 (1.30, 1.83)      | <0.0001 |

*Proportional hazards assumptions met (P value =0.8)*

2. Interaction between diabetes control status (in GoDARTS) and diabetes status (in STABILITY) with Lp-PLA2 activity on the risk of MCE

*ESM Table 5. Interaction effect between linear Lp-PLA2 activity and diabetes-control status (HbA1c < 48 mmol/mol v. ≥ 48 mmol/mol) on the occurrence of MCE in the GoDARTS cohort (n = 7,419)*

|                                                              | <b>HR (95% CI)</b>     | <b>P value</b> |
|--------------------------------------------------------------|------------------------|----------------|
| Interaction:<br>LpPLA2 (nmol/min/ml)*Diabetes control status | 1.001 (1.0005, 1.0015) | 0.004          |
| LpPLA2 (nmol/min/ml)                                         | 1.002 (1.00, 1.002)    | 0.008          |
| Diabetes control status (Poor v. well-controlled)            | 1.29 (1.06, 1.57)      | 0.013          |
| Lipid-controlling medication (Yes/No)                        | 1.52 (1.28, 1.80)      | <0.0001        |
| Diabetes-controlling medication (Yes/No)                     | 1.48 (1.33, 1.64)      | <0.0001        |
| Hypertension controlling medication (Yes/No)                 | 1.69 (1.48, 1.93)      | <0.0001        |
| Age (years)                                                  | 1.05 (1.04, 1.05)      | <0.0001        |
| Smoking status (Yes/No)                                      | 1.30 (1.18, 1.42)      | <0.0001        |
| Sex (M v. F)                                                 | 1.28 (1.17, 1.39)      | <0.0001        |
| Non-HDL cholesterol (mmol/L)                                 | 0.97 (0.90, 1.03)      | 0.32           |

*Proportional hazards assumptions met (P value>0.05)*

*ESM Table 6. Interaction effect between linear Lp-PLA2 activity and diabetes status) on the occurrence of MCE in the STABILITY trial (n = 7,109)*

|                                                                    | <b>HR (95% CI)</b>   | <b>P value</b> |
|--------------------------------------------------------------------|----------------------|----------------|
| Interaction:<br>LpPLA2<br>(nmol/min/ml)*Diabetes<br>control status | 1.004 (1.001, 1.008) | 0.015          |
| LpPLA2 (nmol/min/ml)                                               | 0.99 (0.99, 1.005)   | 0.77           |
| Diabetes status (Type 2<br>diabetes v. no diabetes)                | 0.70 (0.0.36, 1.36)  | 0.29           |
| Sex (M v. F)                                                       | 0.91 (0.71, 1.15)    | 0.42           |
| Age (years)                                                        | 1.02 (1.01, 1.03)    | 0.02           |
| Smoking status (Yes v.No)                                          | 1.40 (1.14, 1.70)    | 0.0011         |
| Hypertension (Yes v No)                                            | 1.30 (1.04, 1.64)    | 0.02           |
| HDL cholesterol (mmol/L)                                           | 1.07 (0.79, 1.44)    | 0.68           |
| Cholesterol (mmol/L)                                               | 1.04 (0.94, 1.15)    | 0.46           |
| High-sensitivity C-reactive<br>Protein (mg/L)                      | 1.013 (1.006, 1.02)  | 0.0004         |
| eGFR (mL/min)                                                      | 0.53 (0.39, 0.73)    | <0.0001        |
| History of Coronary Heart<br>Disease (Yes/No)                      | 1.134 (0.61, 2.12)   | 0.70           |
| History of Cerebrovascular<br>Disease (Yes/No)                     | 1.29 (0.99, 1.67)    | 0.06           |
| History of Abdominal Aortic<br>Aneurysm (Yes/No)                   | 0.61 (0.30, 1.29)    | 0.19           |
| History of Peripheral artery<br>disease (Yes/No)                   | 1.22 (0.39, 3.38)    | 0.73           |

*Proportional hazards assumptions met (P value >0.05).*

*ESM Table 7. Interaction effect between quartiles of Lp-PLA2 activity and diabetes status) on the occurrence of MCE in the GoDARTS cohort (n = 7,419).*

*Overall interaction variable type 3 test (Interaction between diabetes status in each quartile)  
Wald Chi-square for interaction (Wald chi-square 15.8, DF=3, P value 0.001)*

|                                                         | <b>HR (95% CI)</b> | <b>P value</b> |
|---------------------------------------------------------|--------------------|----------------|
| Interaction:<br>LpPLA2 Q4+PC-T2D v.<br>LpPLA2 Q4+WC-T2D | 1.20 (1.16, 1.54)  | 0.04           |
| LpPLA2 Q3+ PC-T2D v.<br>LpPLA2 Q3+ WC-T2D               | 1.16 (0.95, 1.43)  | 0.14           |
| LpPLA2 Q2+ PC-T2D v.<br>LpPLA2 Q2+ WC-T2D               | 1.18 (1.03, 1.36)  | 0.02           |
| LpPLA2 Q1+ PC-T2D v.<br>LpPLA2 Q1+ WC-T2D               | 0.97 (0.79, 1.19)  | 0.11           |
| LpPLA2 quartiles (Q4 v Q1)                              | 1.12 (0.95, 1.36)  | 0.08           |
| LpPLA2 quartiles (Q3 v Q1)                              | 1.10 (0.89, 1.18)  | 0.12           |
| LpPLA2 quartiles (Q2 v Q1)                              | 1.00 (0.78, 1.13)  | 0.65           |
| Diabetes status                                         | 1.04 (0.95, 1.14)  | 0.43           |
| Lipid-controlling medication<br>(Yes/No)                | 1.51 (1.28, 1.79)  | <0.0001        |
| Diabetes-controlling<br>medication (Yes/No)             | 1.43 (1.29, 1.59)  | <0.0001        |
| Hypertension controlling<br>medication (Yes/No)         | 1.70 (1.49, 1.94)  | <0.0001        |
| Age (years)                                             | 1.05 (1.04, 1.05)  | <0.0001        |
| Smoking status (Yes/No)                                 | 1.30 (1.19, 1.42)  | <0.0001        |
| Sex (M v. F)                                            | 1.28 (1.17, 1.40)  | <0.0001        |

*Proportional hazards assumptions met (P value>0.05). PC-T2D: poorly controlled diabetes, WC-T2D: well-controlled diabetes.*

*ESM Table 8. Interaction effect between quartiles of Lp-PLA2 activity and diabetes status on the occurrence of MCE in the placebo-treated arm of the STABILITY trial (n = 7,109).*

*Overall interaction variable type 3 test (Wald chi-square=8.46, DF=3, P =0.0036)*

|                                               | <b>HR (95% CI)</b>  | <b>P value</b> |
|-----------------------------------------------|---------------------|----------------|
| LpPLA2 Q4+T2D v.<br>LpPLA2 Q4+non-T2D         | 2.09 (1.57, 2.78)   | 0.0001         |
| LpPLA2 Q3+T2D v.<br>LpPLA2 Q3+non-T2D         | 1.44 (0.998, 2.06)  | 0.05           |
| LpPLA2 Q2+T2D v.<br>LpPLA2 Q2+non-T2D         | 1.31 (0.90, 1.89)   | 0.2            |
| LpPLA2 Q1+T2D v.<br>LpPLA2 Q1+non-T2D         | 1.11 (0.75, 1.65)   | 0.60           |
| LpPLA2 quartiles (Q4 v Q1)                    | 1.52 (1.21, 1.98)   | 0.002          |
| LpPLA2 quartiles (Q3 v Q1)                    | 1.17 (0.78, 1.33)   | 0.35           |
| LpPLA2 quartiles (Q2 v Q1)                    | 0.98 (0.75, 1.21)   | 0.95           |
| Diabetes status                               | 0.84 (0.53, 1.32)   | 0.45           |
| Age (years)                                   | 1.02 (1.01, 1.03)   | <0.0001        |
| Sex (F v. M)                                  | 0.90 (0.71, 1.14)   | 0.40           |
| Smoking status (Yes v.No)                     | 1.40 (1.14, 1.71)   | 0.001          |
| Hypertension (Yes v No)                       | 1.31 (1.05, 1.65)   | 0.02           |
| HDL cholesterol (mmol/L)                      | 1.01 (0.75, 1.36)   | 0.93           |
| Cholesterol (mmol/L)                          | 1.07 (0.98, 1.16)   | 0.15           |
| High-sensitivity C-reactive Protein (mg/L)    | 1.013 (1.006, 1.02) | 0.0003         |
| eGFR (mL/min)                                 | 0.53 (0.39, 0.73)   | <0.0001        |
| History of Coronary Heart Disease (Yes/No)    | 1.15 (0.61, 2.15)   | 0.67           |
| History of Cerebrovascular Disease (Yes/No)   | 1.30 (0.99, 1.68)   | 0.05           |
| History of Abdominal Aortic Aneurysm (Yes/No) | 0.62 (0.30, 1.31)   | 0.21           |
| History of Peripheral artery disease (Yes/No) | 1.16 (0.37, 3.63)   | 0.80           |

*Proportional hazards assumptions met (P value>0.05). Non-T2D, no diabetes.*



*ESM Table 9. Interaction effect between quartiles of Lp-PLA2 activity and diabetes status on the occurrence of MCE in the darapladib-treated arm of the STABILITY trial (n=7,157)  
Overall interaction variable type 3 test (Wald chi-square=0.4, DF=3, P =0.8)*

|                                               | <b>HR (95% CI)</b>  | <b>P value</b> |
|-----------------------------------------------|---------------------|----------------|
| LpPLA2 Q4+T2D v.<br>LpPLA2 Q4+non-T2D         | 1.40 (1.02, 1.91)   | 0.036          |
| LpPLA2 Q3+T2D v.<br>LpPLA2 Q3+non-T2D         | 1.47 (1.01, 2.13)   | 0.04           |
| LpPLA2 Q2+T2D v.<br>LpPLA2 Q2+non-T2D         | 1.28 (0.88, 1.86)   | 0.20           |
| LpPLA2 Q1+T2D v.<br>LpPLA2 Q1+non-T2D         | 1.77 (1.19, 2.63)   | 0.005          |
| LpPLA2 quartiles (Q4 v Q1)                    | 1.22 (0.82, 1.25)   | 0.58           |
| LpPLA2 quartiles (Q3 v Q1)                    | 1.19 (0.90, 1.30)   | 0.08           |
| LpPLA2 quartiles (Q2 v Q1)                    | 1.12 (0.87, 1.44)   | 0.40           |
| Diabetes status                               | 1.48 (0.93, 2.33)   | 0.09           |
| Age (years)                                   | 1.01 (1.003, 1.03)  | 0.02           |
| Smoking status (Yes v.No)                     | 1.10 (0.90, 1.34)   | 0.81           |
| Hypertension (Yes v No)                       | 1.03 (0.82, 1.28)   | 0.83           |
| HDL cholesterol (mmol/L)                      | 0.72 (0.52, 0.99)   | 0.04           |
| Cholesterol (mmol/L)                          | 1.08 (0.98, 1.18)   | 0.12           |
| High-sensitivity C-reactive Protein (mg/L)    | 1.012 (1.003, 1.02) | 0.006          |
| eGFR (mL/min)                                 | 0.66 (0.48, 0.91)   | 0.01           |
| History of Coronary Heart Disease (Yes/No)    | 1.66 (0.78, 3.49)   | 0.19           |
| History of Cerebrovascular Disease (Yes/No)   | 1.51 (1.16, 1.96)   | 0.002          |
| History of Abdominal Aortic Aneurysm (Yes/No) | 1.35 (0.81, 2.23)   | 0.25           |
| History of Peripheral artery disease (Yes/No) | 3.97 (1.3, 9.66)    | 0.002          |

*Proportional hazards assumptions met (P value>0.05). Sex, smoking status, hypertension, and total cholesterol were non-informative. T2D: type 2 diabetes, non-T2D: no diabetes.*

### 3. Effect stratified by diabetes-control status (GoDARTS) or diabetes status (STABILITY)

ESM Table 10. Stratified effect of successive quartiles of Lp-PLA<sub>2</sub> activity on MCE by diabetes-control status in GoDARTS

| Lp-PLA <sub>2</sub> Quartiles                | Poorly controlled diabetes. HbA1c ≥ 48 mmol/mol or ≥ 6.5% (n=5,441) |                   | Well-controlled diabetes HbA1c < 48 mmol/mol or <6.5% (n=1,979) |         |
|----------------------------------------------|---------------------------------------------------------------------|-------------------|-----------------------------------------------------------------|---------|
|                                              | Hazard ratios (95% CI)                                              | P value           | Hazard ratios (95% CI)                                          | P value |
| Quartile 2 v. 1 *                            | 1.17 (1.01, 1.36)                                                   | 0.014             | 0.93 (0.75, 1.14)                                               | 0.19    |
| Quartile 3 v. 1 *                            | 1.21 (1.05, 1.41)                                                   | 0.02              | 1.08 (0.84, 1.39)                                               | 0.54    |
| <b>Quartile 4 v. 1 *</b>                     | <b>1.35 (1.16, 1.57)</b>                                            | <b>&lt;0.0001</b> | 1.10 (0.80, 1.40)                                               | 0.68    |
| Quartile 4 v. 2 *                            | 1.14 (0.99, 1.33)                                                   | 0.058             | 1.19 (0.91, 1.55)                                               | 0.98    |
| Quartile 4 v. 3 *                            | 1.13 (0.99, 1.29)                                                   | 0.065             | 0.98 (0.76, 1.26)                                               | 0.21    |
| <b>Quartile 4 v. 3-1 <sup>α</sup></b>        | <b>1.19 (1.07, 1.33)</b>                                            | <b>0.001</b>      | 1.06 (0.85, 1.33)                                               | 0.58    |
| Lipid-controlling medication (Yes/No)        | 1.66 (1.32, 2.09)                                                   | <0.0001           | 1.23 (0.92, 1.64)                                               | 0.16    |
| Diabetes-controlling medication (Yes/No)     | 1.55 (1.34, 1.80)                                                   | <0.0001           | 1.33 (1.13, 1.57)                                               | 0.001   |
| Hypertension controlling medication (Yes/No) | 1.60 (1.38, 1.85)                                                   | <0.0001           | 2.19 (1.59, 3.02)                                               | <0.0001 |
| Age (years)                                  | 1.04 (1.037, 1.05)                                                  | <0.0001           | 1.06 (1.05, 1.07)                                               | <0.0001 |
| Smoking status (Yes/No)                      | 1.30 (1.17, 1.45)                                                   | <0.0001           | 1.29 (1.08, 1.55)                                               | 0.006   |
| Sex (M v. F)                                 | 1.22 (1.10, 1.35)                                                   | <0.0001           | 1.44 (1.20, 1.72)                                               | <0.0001 |
| Non-HDL cholesterol (mmol/L)                 | 0.92 (0.90, 1.06)                                                   | 0.63              | 0.92 (0.81, 1.05)                                               | 0.83    |

Proportional hazards assumptions met for both groups: poor glycaemic control group P value=0.8 and good glycaemic control P value = 0.1.

Comparisons labelled with \* and <sup>α</sup> were run in separate models. All other covariates are from model labelled \*. P value for multiple testing of quartile effects = 0.008. Quartile comparisons in bold are significant using the threshold for multiple testing. Effect is presented graphically in ESM Figure 3.

ESM Table 11. Stratified effect of successive quartiles of Lp-PLA2 activity on MCE by type 2 diabetes status in placebo-arm of the STABILITY trial

| Lp-PLA <sub>2</sub> Quartiles                 | Type 2 Diabetes (n=2,872) with CRP (n=2655) |                   | No Diabetes (n=4,782) with CRP (n=4,454) |         |
|-----------------------------------------------|---------------------------------------------|-------------------|------------------------------------------|---------|
|                                               | Hazard Ratio (95% CI)                       | P value           | Hazard Ratio (95% CI)                    | P value |
| Quartile 2 v. 1 *                             | 1.13 (0.76, 1.66)                           | 0.55              | 1.05 (0.74, 1.50)                        | 0.70    |
| Quartile 3 v. 1 *                             | 1.33 (0.90, 1.97)                           | 0.16              | 1.04 (0.74, 1.47)                        | 0.81    |
| <b>Quartile 4 v. 1 *</b>                      | <b>2.50 (1.70, 3.68)</b>                    | <b>&lt;0.0001</b> | 1.27 (0.97, 1.96)                        | 0.09    |
| <b>Quartile 4 v. 2 *</b>                      | <b>1.99 (1.35, 2.93)</b>                    | <b>0.0005</b>     | 1.16 (0.80, 1.68)                        | 0.44    |
| <b>Quartile 4 v. 3 *</b>                      | <b>1.77 (1.25, 2.51)</b>                    | <b>0.001</b>      | 1.14 (0.83, 1.58)                        | 0.42    |
| <b>Quartile 4 v. 3-1<sup>†</sup></b>          | <b>2.18 (1.62, 2.93)</b>                    | <b>&lt;0.0001</b> | 1.22 (0.92, 1.62)                        | 0.17    |
| Age (years)                                   | 1.02 (1.001, 1.032)                         | 0.04              | 1.01 (0.99, 1.03)                        | 0.19    |
| Sex (F v M)                                   | 0.70 (0.50, 1.01)                           | 0.05              | 1.10 (0.81, 1.49)                        | 0.55    |
| Smoking status (Yes v.No)                     | 1.18 (0.90, 1.55)                           | 0.23              | 1.59 (1.21, 2.09)                        | 0.0009  |
| Hypertension (Yes v No)                       | 1.24 (0.94,1.83)                            | 0.28              | 1.40 (1.07, 1.85)                        | 0.02    |
| Total cholesterol (mmol/L)                    | 1.03 (0.90, 1.17)                           | 0.70              | 1.11 (0.99, 1.25)                        | 0.08    |
| eGFR (mL/min/1.73m <sup>2</sup> )             | 0.44 (0.29, 0.68)                           | 0.0002            | 0.65 (0.42, 1.04)                        | 0.07    |
| High-sensitivity C-reactive protein           | 1.013 (1.002, 1.024)                        | 0.03              | 1.01 (1.005, 1.024)                      | 0.003   |
| History of Coronary Heart Disease (Yes/No)    | 1.49 (0.55, 4.002)                          | 0.43              | 0.92 (0.41, 2.07)                        | 0.83    |
| History of Cerebrovascular Disease (Yes/No)   | 1.68 (1.20, 2.33)                           | 0.002             | 0.92 (0.59, 1.42)                        | 0.83    |
| History of Abdominal Aortic Aneurysm (Yes/No) | 0.54 (0.17, 1.71)                           | 0.30              | 0.69 (0.26, 1.87)                        | 0.69    |
| History of Peripheral artery disease (Yes/No) | 0.000 (0.000, 0.000)                        | 0.96              | 4.45 (1.40, 14.12)                       | 0.01    |

Proportional hazards assumptions met for both groups (P value>0.5). Comparisons labelled with \* and † were run in separate models. All other covariates from model labelled \*.

P value for multiple testing of quartile effects = 0.008. Quartile comparisons in bold are significant using the threshold for multiple testing. Effects in T2D groups are presented graphically in ESM Figure 4.

#### 4. Risk groups analysis -drug effect in STABILITY

*ESM Table 12: Effect of LpPLA2 inhibition in STABILITY participants with high Lp-PLA2 activity (Q4) n = 3835 – main text Figure 2. Wald chi-square for interaction term=2.85, DF=1, P value =0.09*

| <b>Variables</b>                              | <b>HR (95% confidence limits)</b> | <b>P value</b> |
|-----------------------------------------------|-----------------------------------|----------------|
| Type 2 diabetes (darapladib v. placebo)       | 0.67 (0.50,0.90)                  | 0.008          |
| No diabetes (darapladib v. placebo)           | 0.96 (0.74,1.26)                  | 0.78           |
| Type 2 diabetes                               | 2.02 (1.52, 2.69)                 | <0.0001        |
| Darapladib v. placebo                         | 0.98 (0.74, 1.30)                 | 0.91           |
| Age (years)                                   | 1.02 (1.00, 1.03)                 | 0.02           |
| Sex (F v. M)                                  | 0.97 (0.64, 1.47)                 | 0.88           |
| Smoking status (Yes v. No)                    | 1.16 (0.84, 1.61)                 | 0.36           |
| Hypertension (Yes v. No)                      | 1.42 (0.97, 2.08)                 | 0.08           |
| Total cholesterol (mmol/L)                    | 1.102 (0.98, 1.24)                | 0.11           |
| eGFR (mL/min/1.73m <sup>2</sup> )             | 0.85 (0.51, 1.40)                 | 0.52           |
| High-sensitivity C-reactive protein           | 1.01 (0.996, 1.024)               | 0.17           |
| History of Coronary Heart Disease (Yes/No)    | 1.88 (0.46, 7.60)                 | 0.377          |
| History of Cerebrovascular Disease (Yes/No)   | 1.18 (0.75, 1.85)                 | 0.48           |
| History of Abdominal Aortic Aneurysm (Yes/No) | 0.74 (0.28, 2.01)                 | 0.56           |
| History of Peripheral artery disease (Yes/No) | 1.03 (0.14 7.47)                  | 0.98           |

*Proportional hazards assumptions met (P value > 0.05).*

ESM Table 13. Association table for drug effect (Lp-PLA2 inhibition) in STABILITY sub-groups – main text Figure 3

| STABILITY sub-groups                                           | n      | Lp-PLA2 inhibitor (darapladib v. placebo) HR (95%CI), P value | Age (years) HR (95%CI), P value | Sex (female v. male) HR (95%CI), P value | Hypertension status HR (95%CI), P value | HDL-c (mmol/L) HR (95%CI), P value | Total cholesterol HR (95%CI), P value | Smoking status HR (95%CI), P value | eGFR (mL/min /1.73m <sup>2</sup> ) HR, (95%CI), P value | History of CeVD HR, (95%CI) P value |
|----------------------------------------------------------------|--------|---------------------------------------------------------------|---------------------------------|------------------------------------------|-----------------------------------------|------------------------------------|---------------------------------------|------------------------------------|---------------------------------------------------------|-------------------------------------|
| Figure 3a. Full population                                     | 15,828 | 0.90 (0.81,1.01), 0.08                                        | 1.01 (1.01,1.03), <0.0001       | 0.89 (0.78,1.05), 0.17                   | 1.25 (1.08,1.46), 0.003                 | 0.66 (0.54,0.80), <0.0001          | 1.16 (1.11,1.22), <0.0001             | 1.27 (1.12,1.47), 0.0004           | 0.55 (0.44,0.68), <0.0001                               | 1.42 (1.19,1.69), <0.0001           |
| Figure 3b. Type 2 diabetes                                     | 5,989  | 0.89 (0.75,1.05), 0.15                                        | 1.01 (1.00,1.03), 0.013         | 0.80 (0.64,1.01), 0.06                   | 1.25 (0.96,1.63), 0.09                  | 0.69 (0.51,0.94), 0.02             | 1.18 (1.10,1.26), <0.0001             | 1.21 (1.00,1.47), 0.05             | 0.50 (0.38,0.67), <0.0001                               | 1.59 (1.26,2.01), <0.0001           |
| Figure 3c. Higher risk group (type 2 diabetes + Lp-PLA2 in Q4) | 1,449  | 0.64 (0.48,0.86), 0.003*                                      | 1.02 (1.00,1.03), 0.11          | 0.87 (0.55,1.37), 0.54                   | 1.59 (0.98,2.56), 0.06                  | 0.56 (0.31,1.01), 0.05             | 1.15 (1.03,1.29), 0.02                | 1.40 (0.97,2.01), 0.07             | 0.75 (0.46,1.23), 0.25                                  | 1.40 (0.92,2.13), 0.12              |
| Figure 3d. Lower risk group (no diabetes + Lp-PLA2 in Q1-3)    | 7,199  | 0.91 (0.75,1.11), 0.34                                        | 1.02 (1.01,1.04), <0.0001       | 0.98 (0.75, 1.27), 0.85                  | 1.23 (0.97,1.56), 0.08                  | 1.002 (0.73,1.38), 0.99            | 1.001 (0.88,1.14), 0.98               | 1.41 (1.12,1.77), 0.003            | 0.58 (0.40,0.86), 0.006                                 | 1.27 (0.91,1.78), 0.16              |

Models adjusted for age, sex, smoking status (ever v. never smoker), hypertension status, HDL-cholesterol, total cholesterol, estimated glomerular filtration rate (eGFR), and a history of cerebrovascular disease (CeVD).

\*In models adjusted for C-reactive protein, the HR for ESM Fig5c (Higher Risk Group) was HR: 0.67 (0.50,0.90) P =0.008 (n=1363).

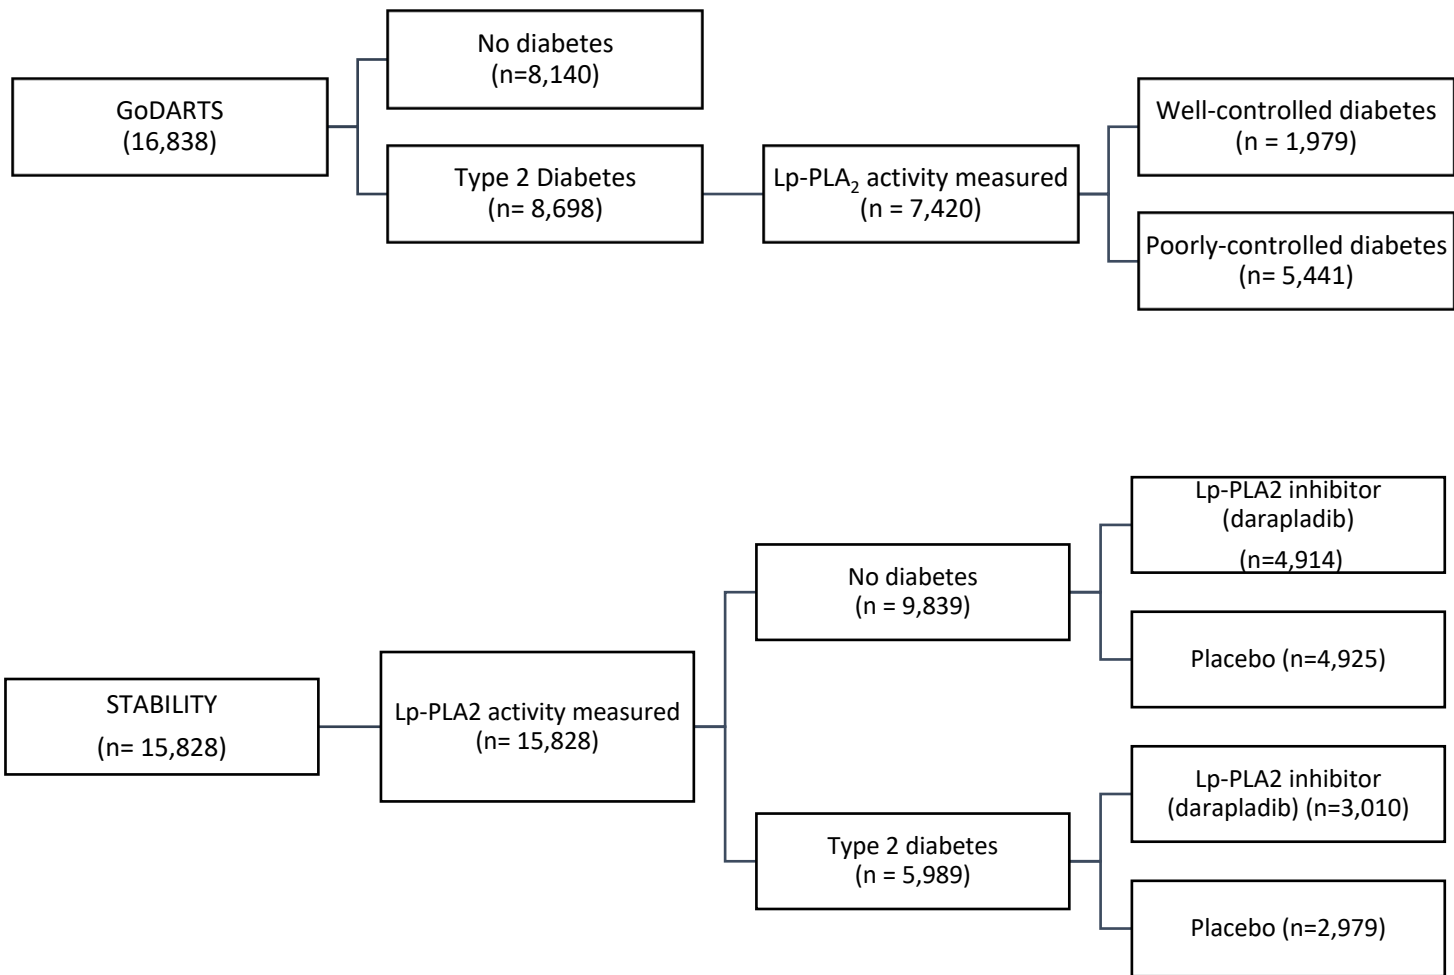

ESM Fig 1. Population flow chart describing both study populations, GoDARTS upper panel and STABILITY lower panel.

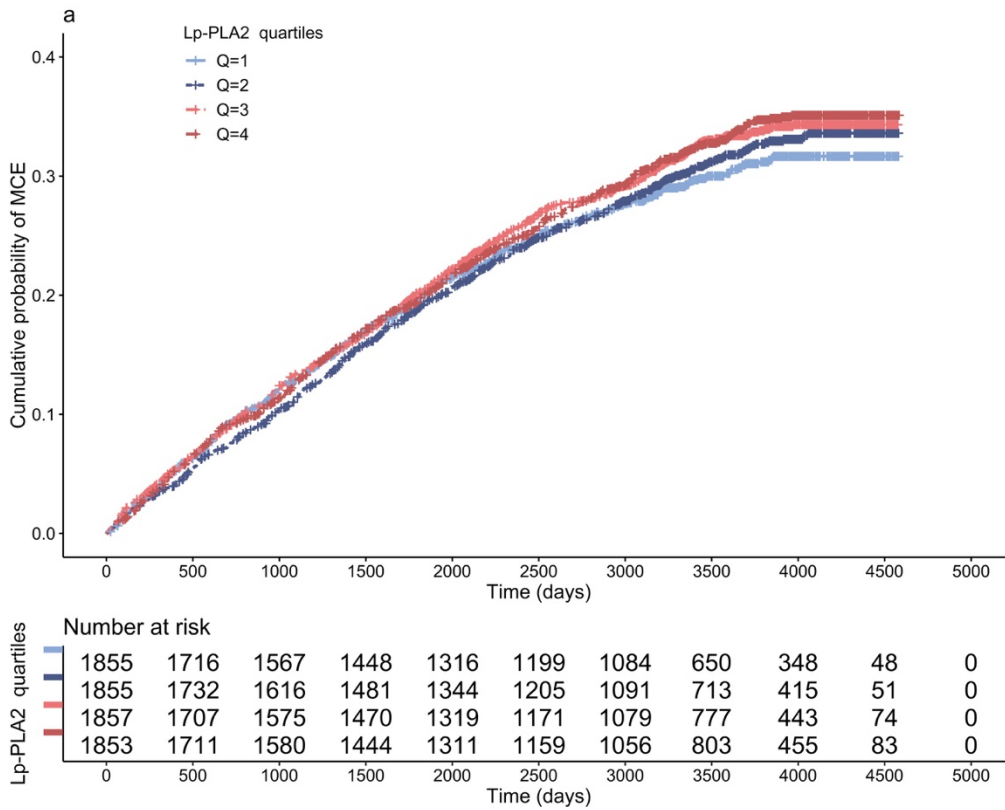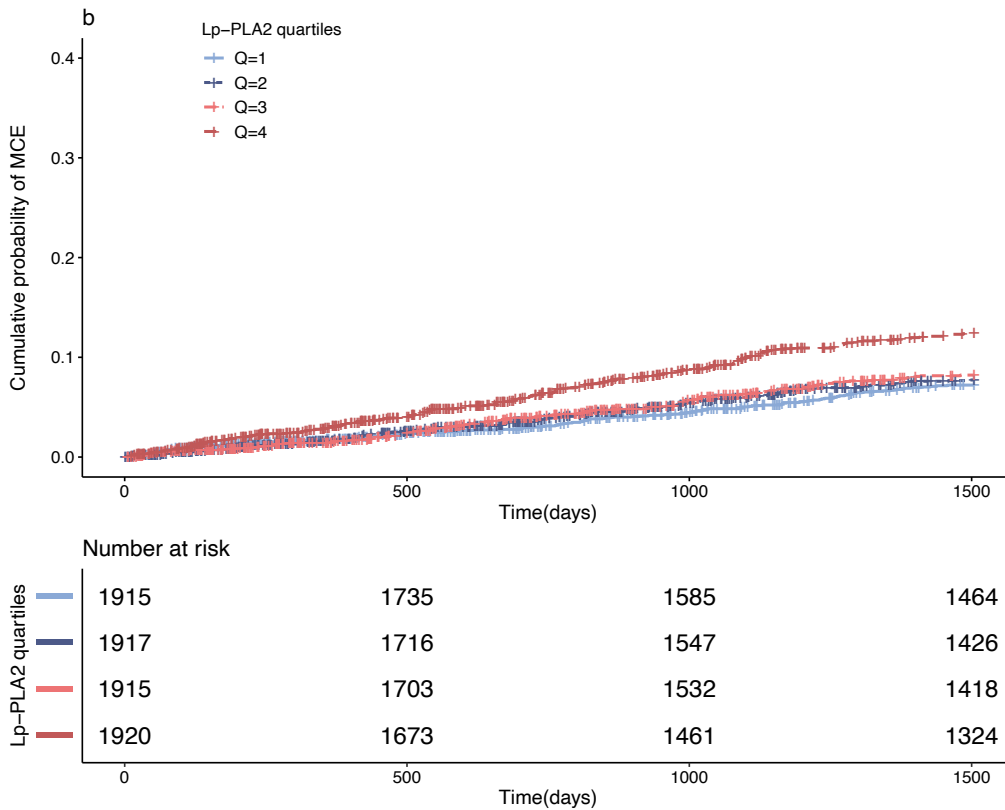

**ESM Fig 2. Demonstrating association between population-specific, successive Lp-PLA2 quartiles and MCE in GoDARTS (2a) and placebo-treated participants in STABILITY (2b). 2a) Hazard ratio (95% confidence interval) for Q4 v. Q1 in GoDARTS = 1.26 (1.10, 1.46), P value <0.0001. Findings from full adjusted for GoDARTS in [ESM Table 3](#). 2b) Hazard ratio for STABILITY Q4 v. Q1 = 1.76, (95%CI:1.33, 2.33), P< 0.0001. Findings from full adjusted model for STABILITY in [ESM Table 4](#). These plots represent main effects.**

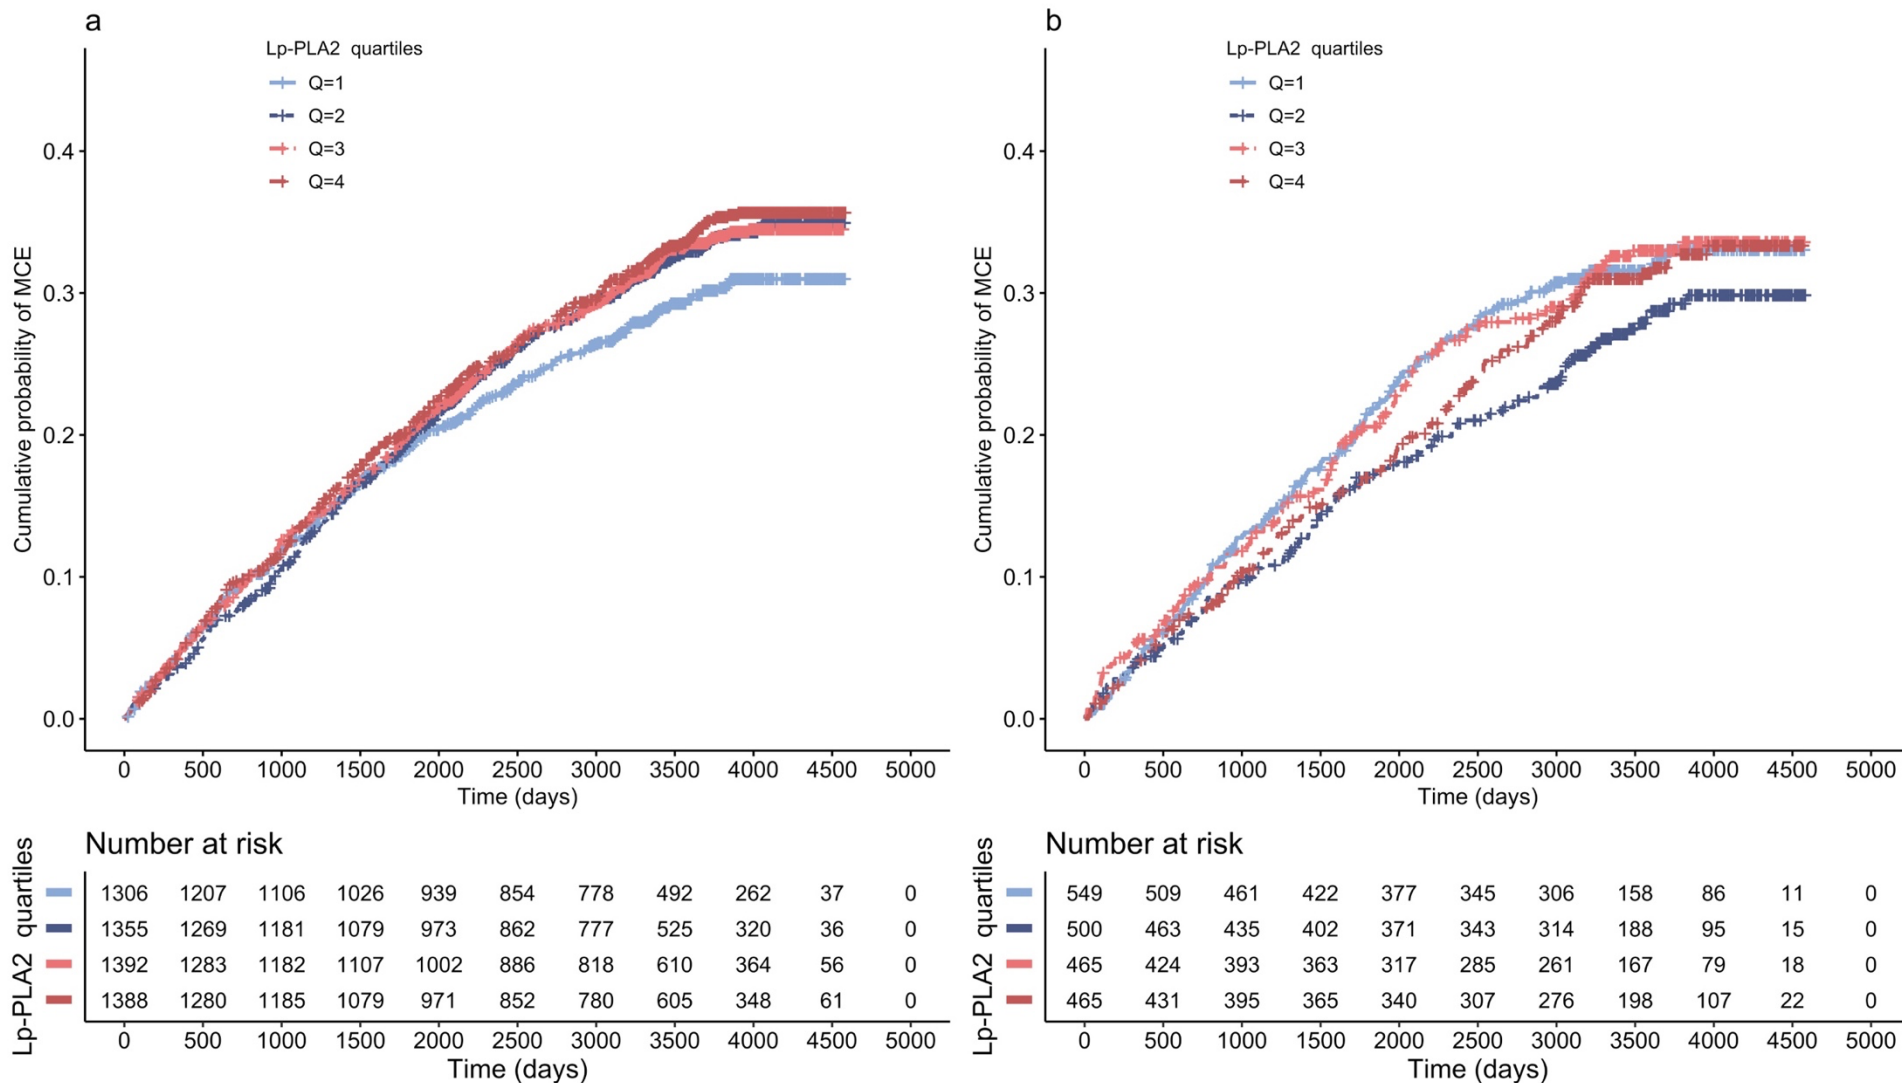

ESM Fig 3. Stratified effect of successive Lp-PLA2 quartiles on the risk of MCE by diabetes control status in GoDARTS. 1a. Cumulative hazards plot of the association in individuals with poorly-controlled diabetes. Hazard Ratio (95% Confidence Interval): Q4 v. Q1 = 1.35 (1.16, 1.57). Figure 1 b. Cumulative hazards plot of the association in individuals with well-controlled diabetes HR (95% confidence interval) Q4 v. Q1 = 1.10 (0.80, 1.40). Model presented in graphs are unadjusted for covariates. Findings from full adjusted model in ESM Table 10.



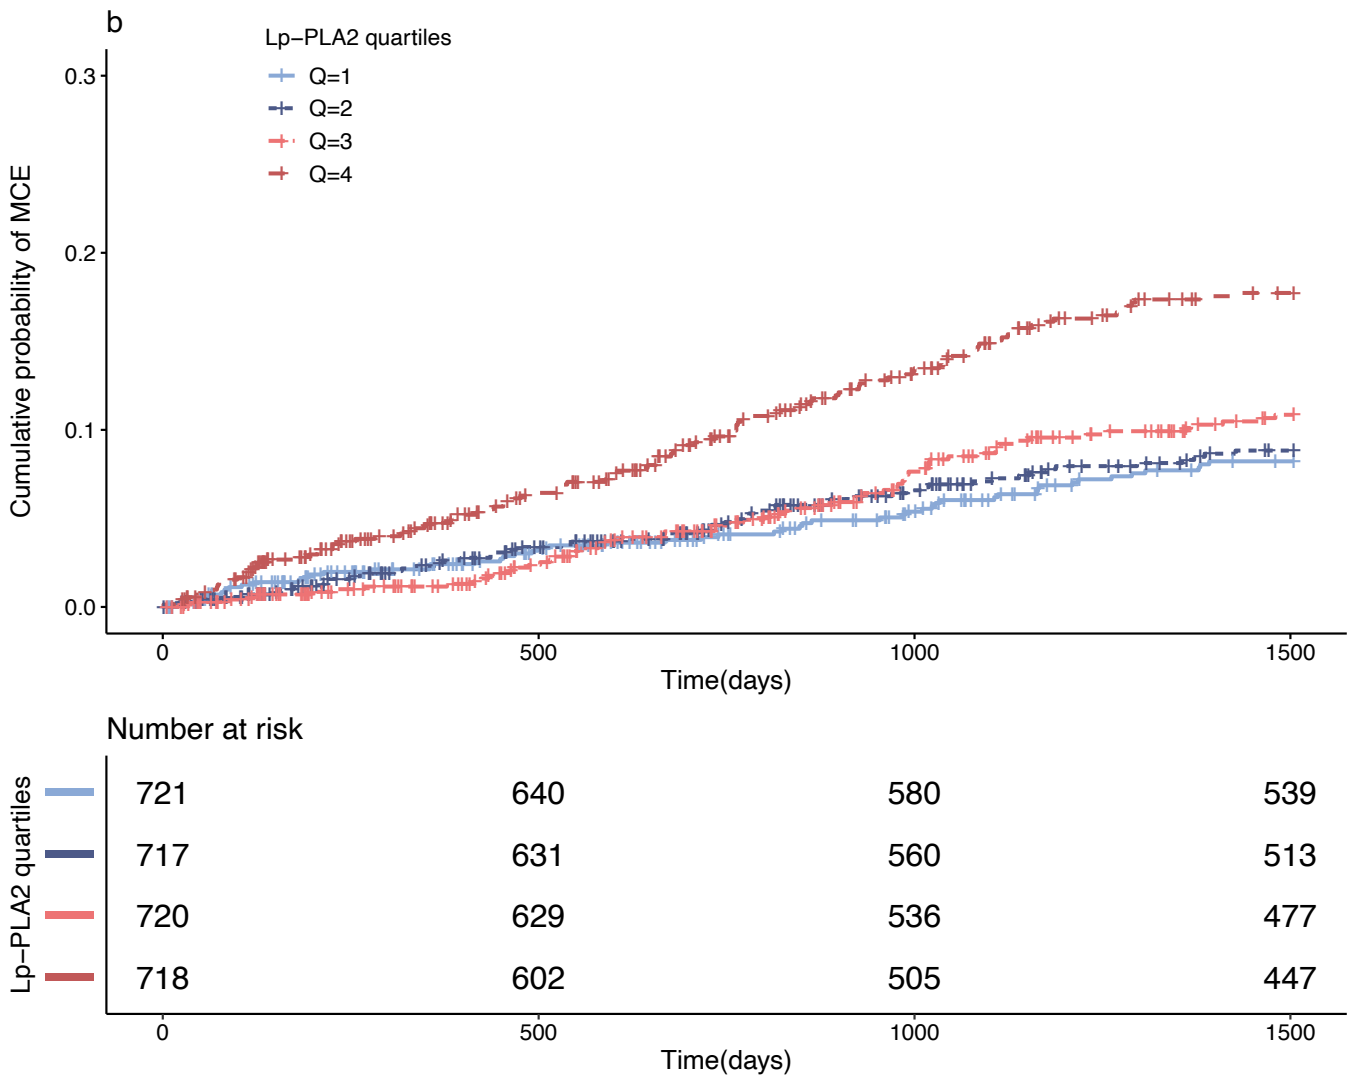

*ESM Fig 4. STABILITY trial: Hazards of increasing quartiles of Lp-PLA<sub>2</sub> activity on the risk of MCE in participants with type 2 diabetes receiving placebo. This plot represents main effects. Hazard ratio (95% confidence interval) for Q4 v. Q1 = 2.50 (1.70,3.68), P <0.0001. Hazard ratio (95% confidence interval) for Q4 v. Q3-1 = 2.18 (1.62, 2.93) <0.0001. Findings from full adjusted models presented in ESM Table 11.*

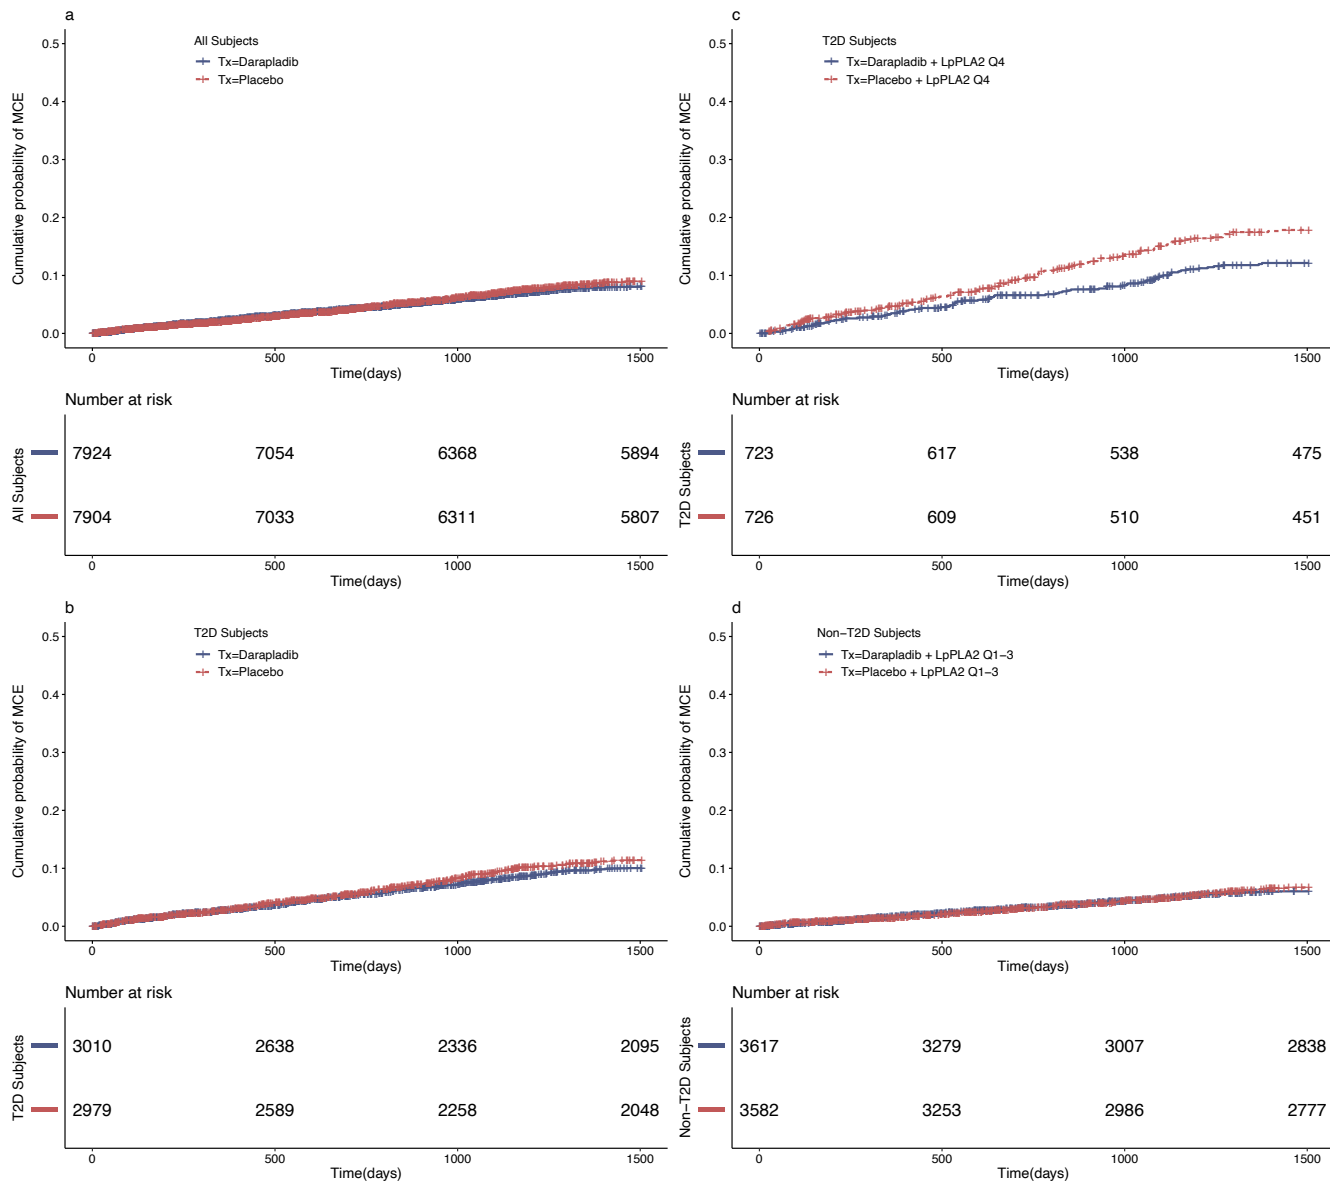

ESM Fig 5. Panels displaying the effect of darapladib therapy in different sub-groups of the STABILITY trial. 3a Effect of darapladib therapy in the entire STABILITY population HR 0.90(95%CI:0.81,1.01)  $P = 0.07$ , 3b. Effect in trial participants with type 2 diabetes 0.89(0.75,1.05)  $P = 0.15$ , 3c. Effect in the higher risk group (type 2 diabetes + Lp-PLA2 activity in Q4) and 0.64 (0.48,0.86)  $P = 0.003$  and 3d. Effect in the lower risk group (no type 2 and Lp-PLA2 activity in Q1-3). HR 0.91, (95%CI 0.75, 1.10),  $P = 0.34$ . Non-T2D, no diabetes. Models presented in graphs are unadjusted for covariates (Findings from full adjusted models in ESM Table 13).
